# Supplementary material for: Flood risk assessment of the European road network
Source: Copernicus journal article supplement (doi:10.5194/nhess-21-1011-2021), 2021-03-15

## Supplementary Information

Van Ginkel, Dottori, Alfieri, Feyen and Koks (2021): *Flood risk assessment of the European road network, NHESS*.

This supplement has the following contents:

|                                                                                                    |    |
|----------------------------------------------------------------------------------------------------|----|
| 1. Assumptions for the flood risk calculation .....                                                | 2  |
| 2. Comparison between the grid-based and object-based exposure datasets .....                      | 3  |
| 3. Assumed infrastructure percentages per grid-cell in the grid-based approach .....               | 4  |
| 4. Use of OpenStreetMap road types in the object-based approach.....                               | 5  |
| 5. Object-based implementation of the Huizinga damage curves .....                                 | 5  |
| 6. Road construction and road maintenance costs .....                                              | 6  |
| 7A. New damage curves: motorway curves (for OSM's motorways and trunk roads) .....                 | 11 |
| 7B. New damage curves: other curves (for OSM's primary, secondary, tertiary and other roads) ..... | 12 |
| 8. Protocol for implementation of new damage curves .....                                          | 13 |
| 9. Additional model results .....                                                                  | 14 |
| 10. Validation event data.....                                                                     | 21 |
| 11. Data from reference study mentioned in the discussion .....                                    | 22 |
| 12. References .....                                                                               | 23 |
| 13. Large map of the results (also available as shapefile) .....                                   | 24 |

























## S9. Additional model results

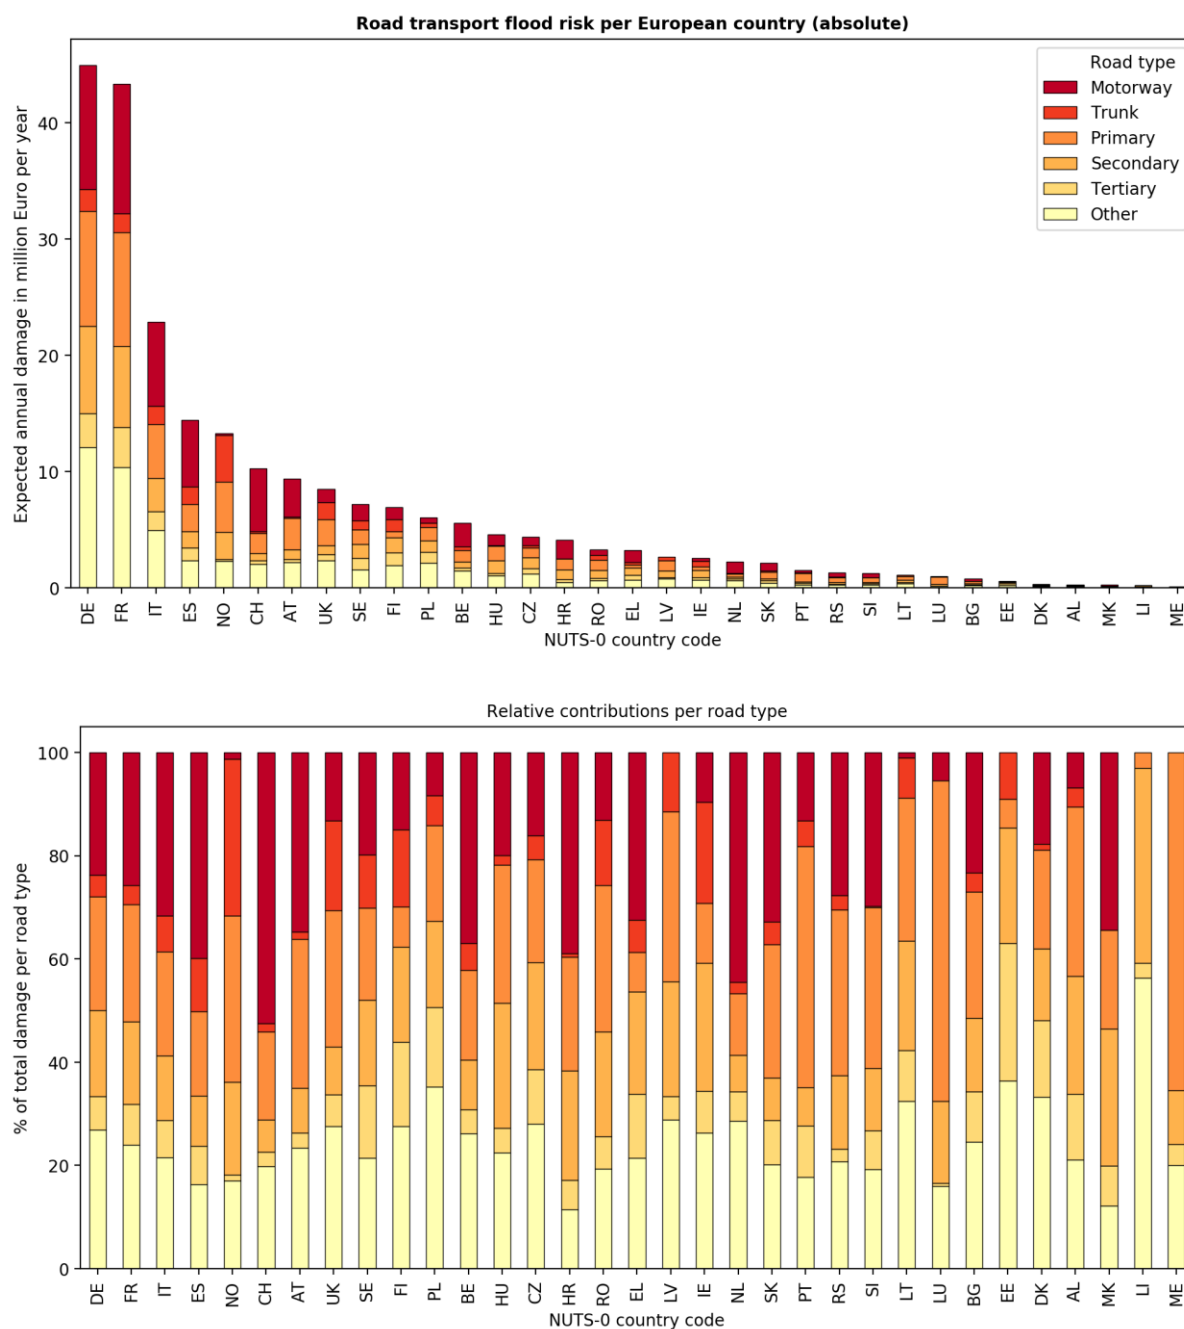

Figure S5 Flood risk per European country in the object-based approach with the new damage curves

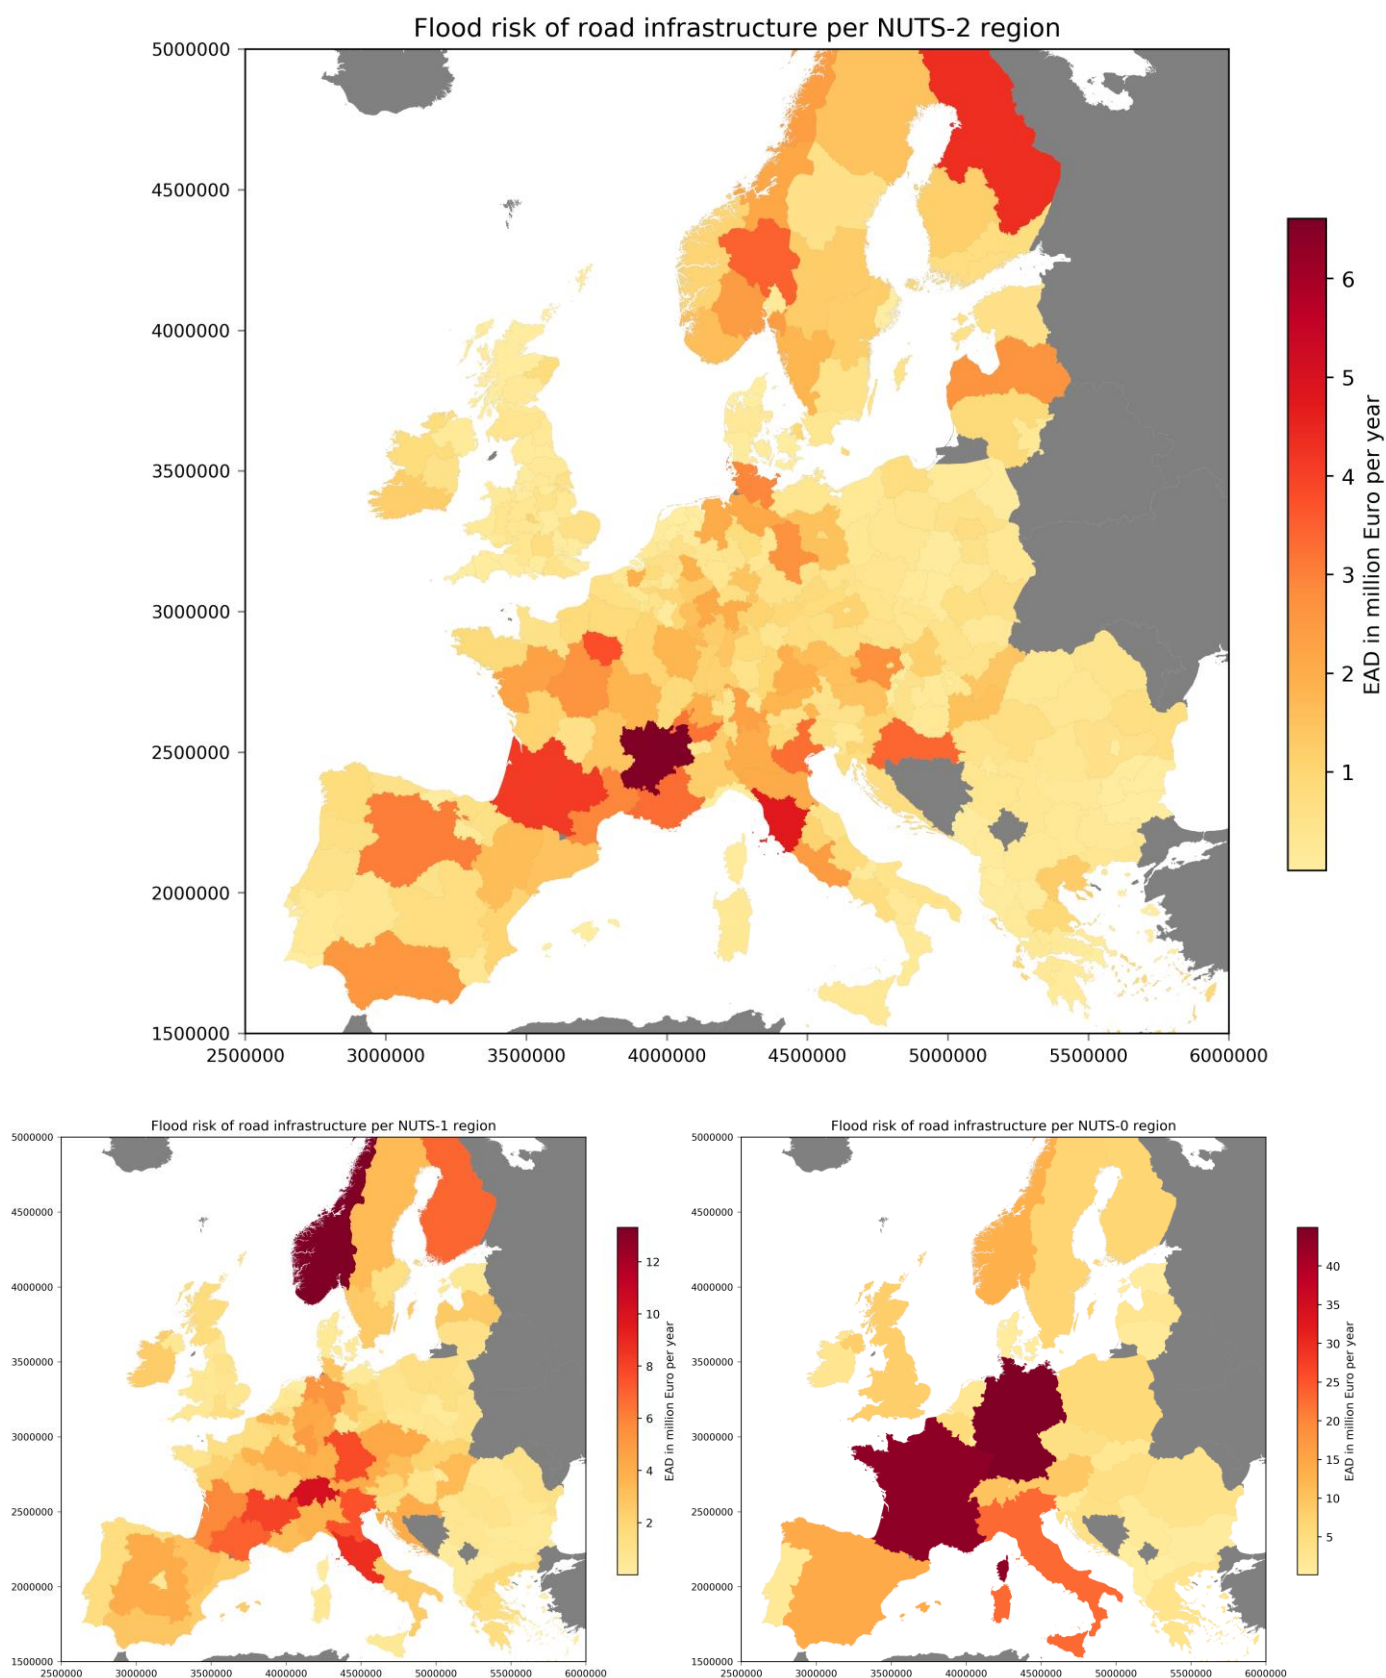

**Figure S6 EAD to road infrastructure in the Europe at different levels of aggregation using the NUTS-classification**  
All maps are shown in the EPSG:3035 – ETRS89 / LAEA Europe coordinate reference system.



**Table S16 Top-20 NUTS-2 regions with the largest expected annual damage**

| NUTS-2 code | NUTS-2 name                | EAD (million €/y) |
|-------------|----------------------------|-------------------|
| FRK2        | Rhône-Alpes                | 6.61              |
| ITI1        | Toscana                    | 4.73              |
| FI1D        | Pohjois- ja Itä-Suomi      | 4.35              |
| FRI1        | Aquitaine                  | 4.14              |
| FRJ2        | Midi-Pyrénées              | 4.13              |
| FR10        | Ile-de-France              | 3.79              |
| NO02        | Hedmark og Oppland         | 3.47              |
| HR04        | Kontinentalna Hrvatska     | 3.38              |
| FRL0        | Provence-Alpes-Côte d’Azur | 3.33              |
| ITH3        | Veneto                     | 3.30              |
| CH01        | Région lémanique           | 3.21              |
| ES41        | Castilla y León            | 3.06              |
| DEF0        | Schleswig-Holstein         | 2.93              |
| FRJ1        | Languedoc-Roussillon       | 2.93              |
| AT12        | Niederösterreich           | 2.72              |
| DEE0        | Sachsen-Anhalt             | 2.68              |
| FRB0        | Centre - Val de Loire      | 2.65              |
| LV00        | Latvija                    | 2.64              |
| ES61        | Andalucía                  | 2.53              |
| ITI4        | Lazio                      | 2.46              |













### **S13. Large map of the results (also available as shapefile)**

Figure S8 (next page): Flood risk of motorways and trunk roads of the European road network  
Road geometries © OpenStreetMap contributors 2019. Distributed under a Creative Commons BY-SA License.

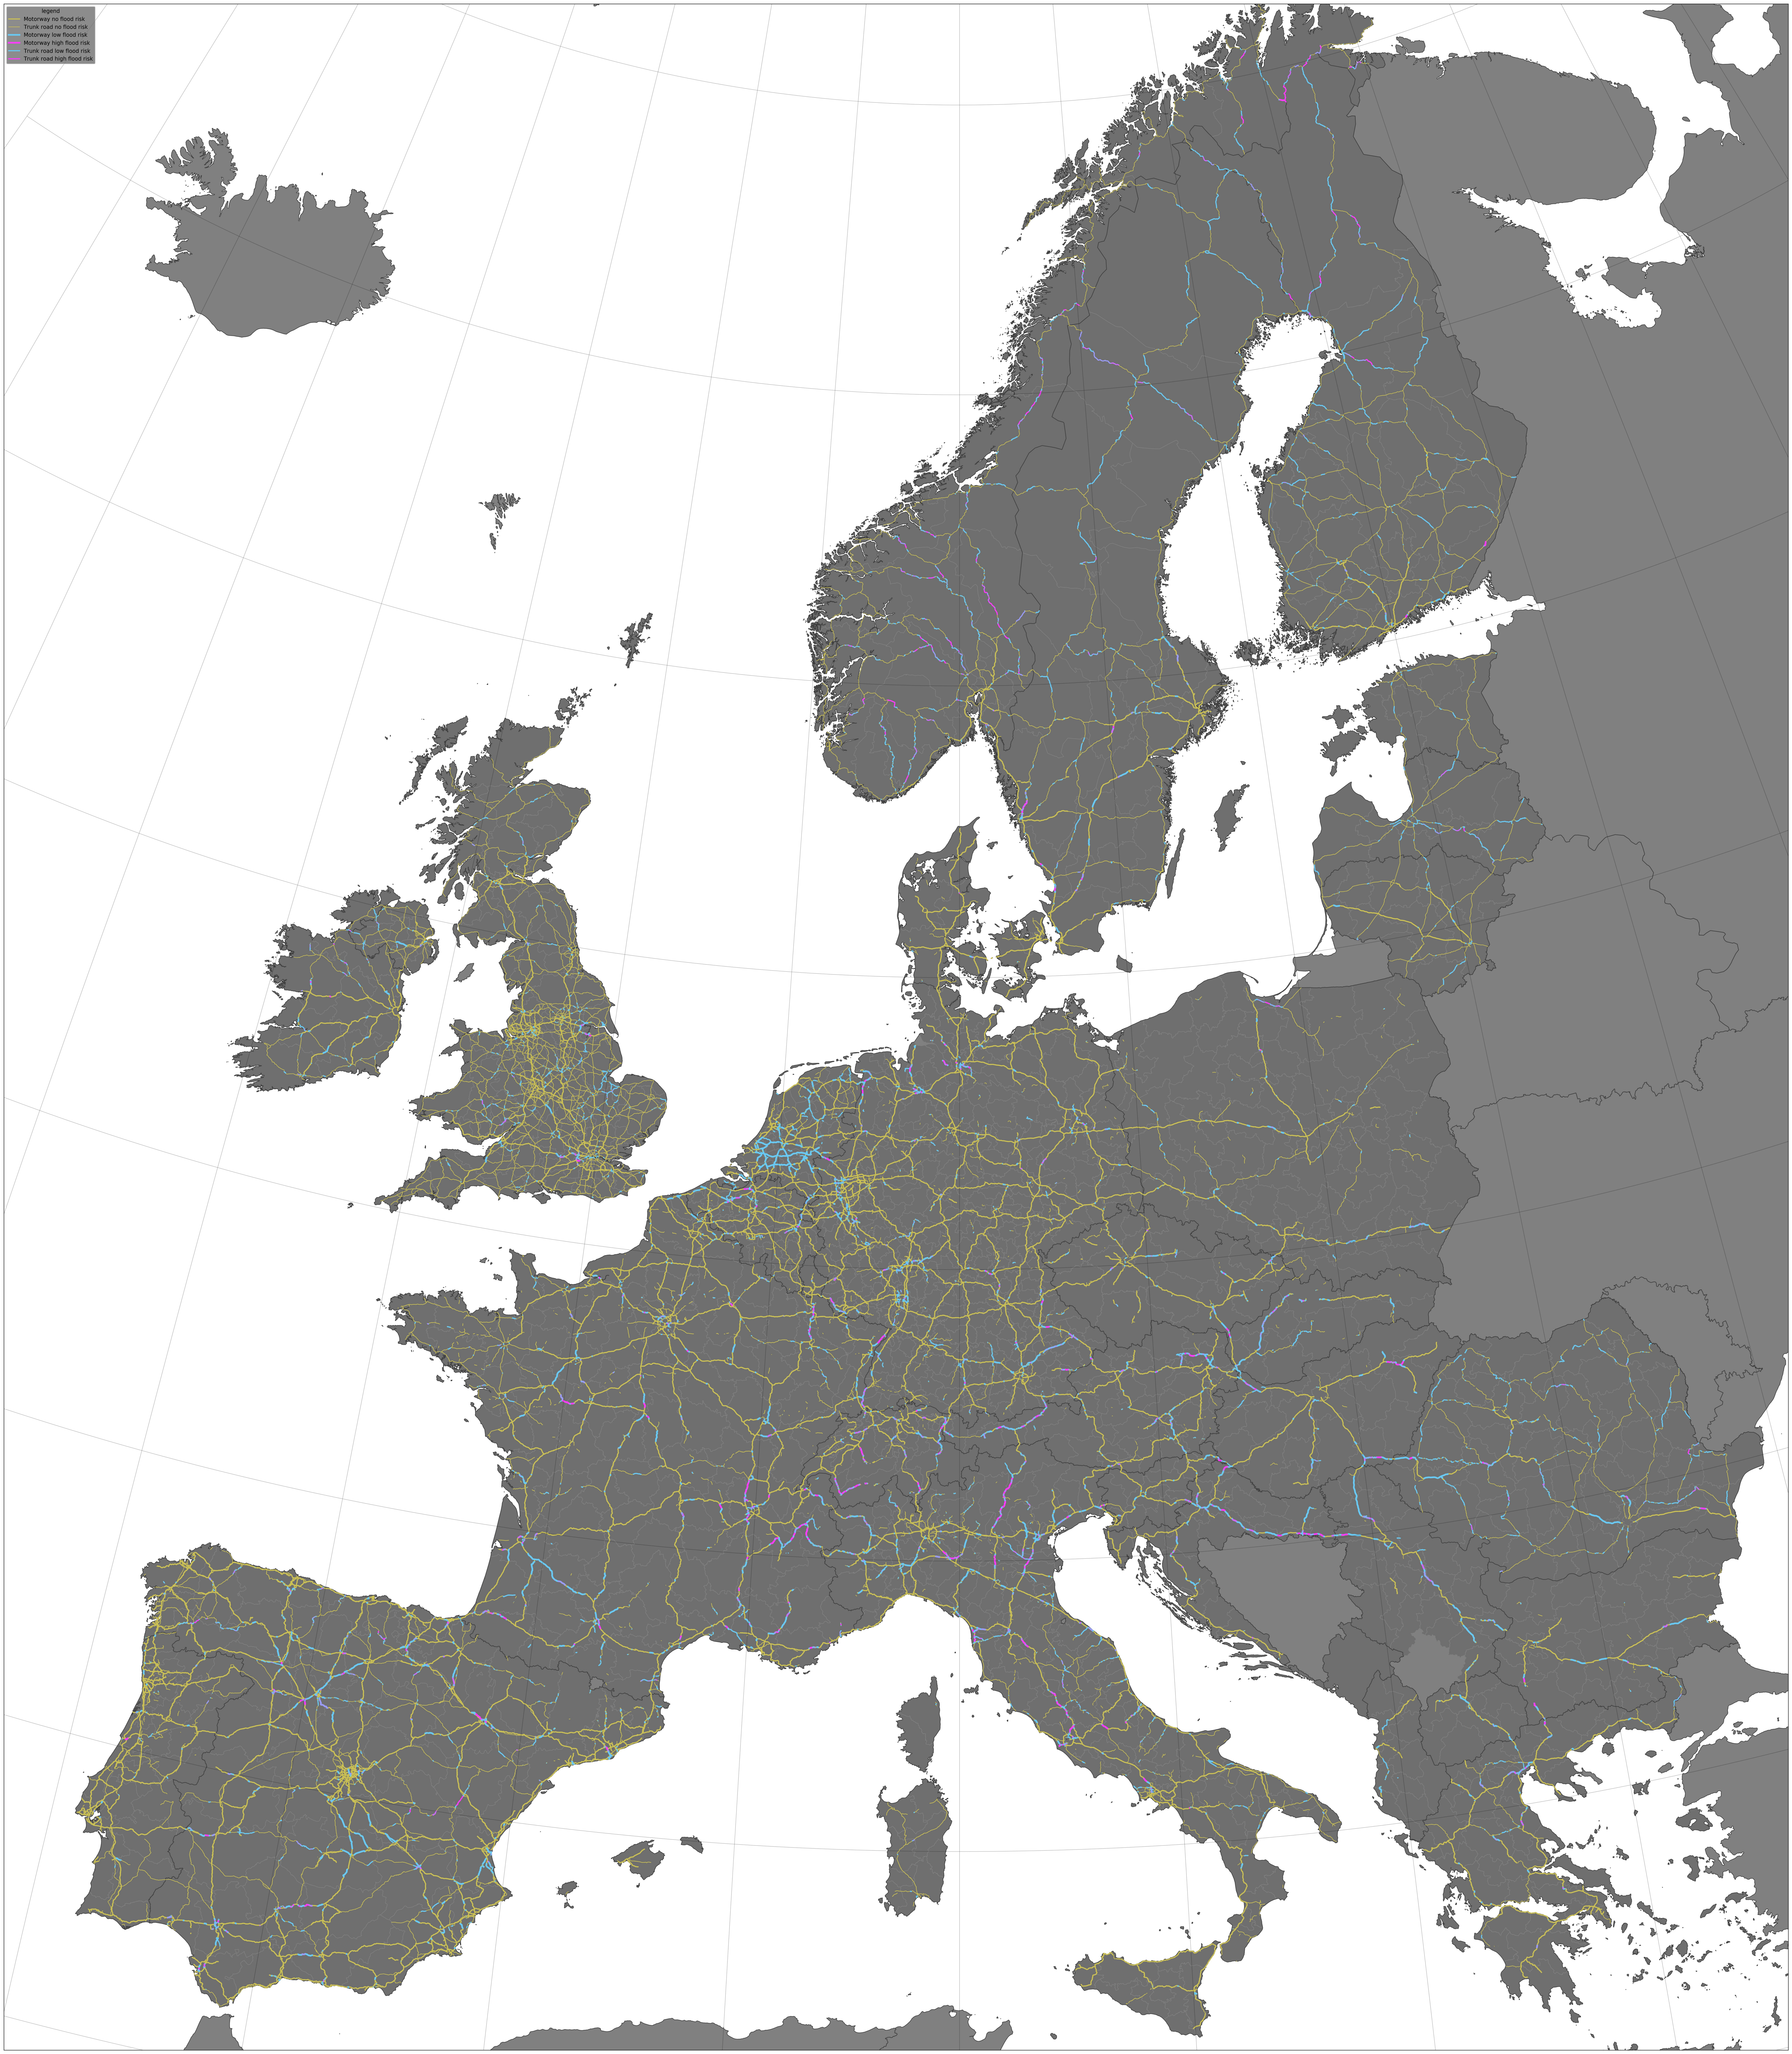

Supplement: Supplementary file 1 [file Supplementary information.pdf › Supplementary information.pdf]
