# Supplementary material for: Flood risk assessment of the European road network
Source: Copernicus journal article supplement (doi:10.5194/nhess-21-1011-2021), 2021-03-15
Supplement: Supplementary file [file nhess-21-1011-2021-supplement-title-page.pdf › nhess-21-1011-2021-supplement-title-page.pdf]

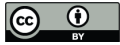

## *Supplement of*

# **Flood risk assessment of the European road network**

**Kees C. H. van Ginkel et al.**

*Correspondence to:* Kees C. H. van Ginkel (kees.vanginkel@deltares.nl)

- nhess-21-1011-2021-supplement-title-page.pdf
- SI\_Fig7\_S8\_shapefile
  - README.txt
  - Shapefile
    - \* .ipynb\_checkpoints
    - \* AL\_motorway.cpg
    - \* AL\_motorway.dbf
    - \* AL\_motorway.prj
    - \* AL\_motorway.shp
    - \* AL\_motorway.shx
    - \* AL\_trunk.cpg
    - \* AL\_trunk.dbf
    - \* AL\_trunk.prj
    - \* AL\_trunk.shp
    - \* AL\_trunk.shx
    - \* AT\_motorway.cpg
    - \* AT\_motorway.dbf
    - \* AT\_motorway.prj
    - \* AT\_motorway.shp
    - \* AT\_motorway.shx
    - \* AT\_trunk.cpg
    - \* AT\_trunk.dbf
    - \* AT\_trunk.prj
    - \* AT\_trunk.shp
    - \* AT\_trunk.shx
    - \* BE\_motorway.cpg
    - \* BE\_motorway.dbf
    - \* BE\_motorway.prj
    - \* BE\_motorway.shp

- \* BE\_motorway.shx
- \* BE\_trunk.cpg
- \* BE\_trunk.dbf
- \* BE\_trunk.prj
- \* BE\_trunk.shp
- \* BE\_trunk.shx
- \* BG\_motorway.cpg
- \* BG\_motorway.dbf
- \* BG\_motorway.prj
- \* BG\_motorway.shp
- \* BG\_motorway.shx
- \* BG\_trunk.cpg
- \* BG\_trunk.dbf
- \* BG\_trunk.prj
- \* BG\_trunk.shp
- \* BG\_trunk.shx
- \* CH\_motorway.cpg
- \* CH\_motorway.dbf
- \* CH\_motorway.prj
- \* CH\_motorway.shp
- \* CH\_motorway.shx
- \* CH\_trunk.cpg
- \* CH\_trunk.dbf
- \* CH\_trunk.prj
- \* CH\_trunk.shp
- \* CH\_trunk.shx
- \* CZ\_motorway.cpg
- \* CZ\_motorway.dbf
- \* CZ\_motorway.prj
- \* CZ\_motorway.shp
- \* CZ\_motorway.shx
- \* CZ\_trunk.cpg
- \* CZ\_trunk.dbf
- \* CZ\_trunk.prj
- \* CZ\_trunk.shp
- \* CZ\_trunk.shx
- \* DE\_motorway.cpg
- \* DE\_motorway.dbf
- \* DE\_motorway.prj
- \* DE\_motorway.shp
- \* DE\_motorway.shx
- \* DE\_trunk.cpg
- \* DE\_trunk.dbf
- \* DE\_trunk.prj
- \* DE\_trunk.shp
- \* DE\_trunk.shx
- \* DK\_motorway.cpg

- \* DK\_motorway.dbf
- \* DK\_motorway.prj
- \* DK\_motorway.shp
- \* DK\_motorway.shx
- \* DK\_trunk.cpg
- \* DK\_trunk.dbf
- \* DK\_trunk.prj
- \* DK\_trunk.shp
- \* DK\_trunk.shx
- \* EL\_motorway.cpg
- \* EL\_motorway.dbf
- \* EL\_motorway.prj
- \* EL\_motorway.shp
- \* EL\_motorway.shx
- \* EL\_trunk.cpg
- \* EL\_trunk.dbf
- \* EL\_trunk.prj
- \* EL\_trunk.shp
- \* EL\_trunk.shx
- \* ES\_motorway.cpg
- \* ES\_motorway.dbf
- \* ES\_motorway.prj
- \* ES\_motorway.shp
- \* ES\_motorway.shx
- \* ES\_trunk.cpg
- \* ES\_trunk.dbf
- \* ES\_trunk.prj
- \* ES\_trunk.shp
- \* ES\_trunk.shx
- \* FI\_motorway.cpg
- \* FI\_motorway.dbf
- \* FI\_motorway.prj
- \* FI\_motorway.shp
- \* FI\_motorway.shx
- \* FI\_trunk.cpg
- \* FI\_trunk.dbf
- \* FI\_trunk.prj
- \* FI\_trunk.shp
- \* FI\_trunk.shx
- \* FR\_motorway.cpg
- \* FR\_motorway.dbf
- \* FR\_motorway.prj
- \* FR\_motorway.shp
- \* FR\_motorway.shx
- \* FR\_trunk.cpg
- \* FR\_trunk.dbf
- \* FR\_trunk.prj

- \* FR\_trunk.shp
- \* FR\_trunk.shx
- \* HR\_motorway.cpg
- \* HR\_motorway.dbf
- \* HR\_motorway.prj
- \* HR\_motorway.shp
- \* HR\_motorway.shx
- \* HR\_trunk.cpg
- \* HR\_trunk.dbf
- \* HR\_trunk.prj
- \* HR\_trunk.shp
- \* HR\_trunk.shx
- \* HU\_motorway.cpg
- \* HU\_motorway.dbf
- \* HU\_motorway.prj
- \* HU\_motorway.shp
- \* HU\_motorway.shx
- \* HU\_trunk.cpg
- \* HU\_trunk.dbf
- \* HU\_trunk.prj
- \* HU\_trunk.shp
- \* HU\_trunk.shx
- \* IE\_motorway.cpg
- \* IE\_motorway.dbf
- \* IE\_motorway.prj
- \* IE\_motorway.shp
- \* IE\_motorway.shx
- \* IE\_trunk.cpg
- \* IE\_trunk.dbf
- \* IE\_trunk.prj
- \* IE\_trunk.shp
- \* IE\_trunk.shx
- \* IT\_motorway.cpg
- \* IT\_motorway.dbf
- \* IT\_motorway.prj
- \* IT\_motorway.shp
- \* IT\_motorway.shx
- \* IT\_trunk.cpg
- \* IT\_trunk.dbf
- \* IT\_trunk.prj
- \* IT\_trunk.shp
- \* IT\_trunk.shx
- \* LT\_motorway.cpg
- \* LT\_motorway.dbf
- \* LT\_motorway.prj
- \* LT\_motorway.shp
- \* LT\_motorway.shx

- \* LT\_trunk.cpg
- \* LT\_trunk.dbf
- \* LT\_trunk.prj
- \* LT\_trunk.shp
- \* LT\_trunk.shx
- \* LU\_motorway.cpg
- \* LU\_motorway.dbf
- \* LU\_motorway.prj
- \* LU\_motorway.shp
- \* LU\_motorway.shx
- \* LU\_trunk.cpg
- \* LU\_trunk.dbf
- \* LU\_trunk.prj
- \* LU\_trunk.shp
- \* LU\_trunk.shx
- \* MK\_motorway.cpg
- \* MK\_motorway.dbf
- \* MK\_motorway.prj
- \* MK\_motorway.shp
- \* MK\_motorway.shx
- \* MK\_trunk.cpg
- \* MK\_trunk.dbf
- \* MK\_trunk.prj
- \* MK\_trunk.shp
- \* MK\_trunk.shx
- \* NL\_motorway.cpg
- \* NL\_motorway.dbf
- \* NL\_motorway.prj
- \* NL\_motorway.shp
- \* NL\_motorway.shx
- \* NL\_trunk.cpg
- \* NL\_trunk.dbf
- \* NL\_trunk.prj
- \* NL\_trunk.shp
- \* NL\_trunk.shx
- \* NO\_motorway.cpg
- \* NO\_motorway.dbf
- \* NO\_motorway.prj
- \* NO\_motorway.shp
- \* NO\_motorway.shx
- \* NO\_trunk.cpg
- \* NO\_trunk.dbf
- \* NO\_trunk.prj
- \* NO\_trunk.shp
- \* NO\_trunk.shx
- \* PL\_motorway.cpg
- \* PL\_motorway.dbf

- \* PL\_motorway.prj
- \* PL\_motorway.shp
- \* PL\_motorway.shx
- \* PL\_trunk.cpg
- \* PL\_trunk.dbf
- \* PL\_trunk.prj
- \* PL\_trunk.shp
- \* PL\_trunk.shx
- \* PT\_motorway.cpg
- \* PT\_motorway.dbf
- \* PT\_motorway.prj
- \* PT\_motorway.shp
- \* PT\_motorway.shx
- \* PT\_trunk.cpg
- \* PT\_trunk.dbf
- \* PT\_trunk.prj
- \* PT\_trunk.shp
- \* PT\_trunk.shx
- \* README.txt
- \* RO\_motorway.cpg
- \* RO\_motorway.dbf
- \* RO\_motorway.prj
- \* RO\_motorway.shp
- \* RO\_motorway.shx
- \* RO\_trunk.cpg
- \* RO\_trunk.dbf
- \* RO\_trunk.prj
- \* RO\_trunk.shp
- \* RO\_trunk.shx
- \* RS\_motorway.cpg
- \* RS\_motorway.dbf
- \* RS\_motorway.prj
- \* RS\_motorway.shp
- \* RS\_motorway.shx
- \* RS\_trunk.cpg
- \* RS\_trunk.dbf
- \* RS\_trunk.prj
- \* RS\_trunk.shp
- \* RS\_trunk.shx
- \* SE\_motorway.cpg
- \* SE\_motorway.dbf
- \* SE\_motorway.prj
- \* SE\_motorway.shp
- \* SE\_motorway.shx
- \* SE\_trunk.cpg
- \* SE\_trunk.dbf
- \* SE\_trunk.prj

- \* SE\_trunk.shp
- \* SE\_trunk.shx
- \* SI\_motorway.cpg
- \* SI\_motorway.dbf
- \* SI\_motorway.prj
- \* SI\_motorway.shp
- \* SI\_motorway.shx
- \* SI\_trunk.cpg
- \* SI\_trunk.dbf
- \* SI\_trunk.prj
- \* SI\_trunk.shp
- \* SI\_trunk.shx
- \* SK\_motorway.cpg
- \* SK\_motorway.dbf
- \* SK\_motorway.prj
- \* SK\_motorway.shp
- \* SK\_motorway.shx
- \* SK\_trunk.cpg
- \* SK\_trunk.dbf
- \* SK\_trunk.prj
- \* SK\_trunk.shp
- \* SK\_trunk.shx
- \* UK\_motorway.cpg
- \* UK\_motorway.dbf
- \* UK\_motorway.prj
- \* UK\_motorway.shp
- \* UK\_motorway.shx
- \* UK\_trunk.cpg
- \* UK\_trunk.dbf
- \* UK\_trunk.prj
- \* UK\_trunk.shp
- \* UK\_trunk.shx

- Supplementary information.pdf

The copyright of individual parts of the supplement might differ from the article licence.
